# Supplementary material for: Expanding the horizons for viable precursors and liquid fluxes for the synthesis of BaZrS3 and related compounds
Source: Royal Society of Chemistry journal article supplement (doi:10.1039/d4tc02287d), 2024-01-01
Supplement: d4tc02287d1.pdf [file d4tc02287d1.pdf]

## Supplementary Information

### **Expanding the Horizons for Viable Precursors and Liquid Fluxes for the Synthesis of BaZrS<sub>3</sub> and Related Compounds**

Kiruba Catherine Vincent<sup>\*, a</sup>, Shubhanshu Agarwal<sup>\*, a</sup>, Zirui Fan<sup>a</sup>, Alison Sofia Mesa Canizales<sup>b</sup>,  
and Rakesh Agrawal<sup>\*\*</sup>, <sup>a</sup>

<sup>a</sup>Davidson School of Chemical Engineering, Purdue University, West Lafayette, IN 47907(USA)

<sup>b</sup>Chemical and Environmental Engineering, Universidad Nacional de Colombia, Bogota D.C.  
(Colombia)

\*Equal Contribution

\*\*Corresponding author: Dr. Rakesh Agrawal. E-mail: [agrawalr@purdue.edu](mailto:agrawalr@purdue.edu)

# Ba-Zr-S powder reactions

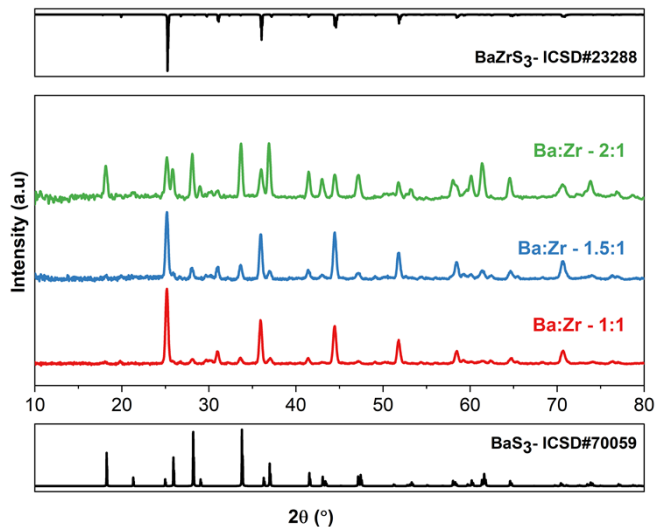

**Figure S1.** X-ray diffraction pattern of Ba-Zr-S powder synthesized with different Ba:Zr ratios at 575 °C for 12 h with a sulfur pressure of 0.79 atm. BaS and  $\text{ZrS}_2$  were used as barium and zirconium precursors, respectively. The X-ray diffraction patterns were collected before rinsing the powders with water as against data in Figure 1.a.

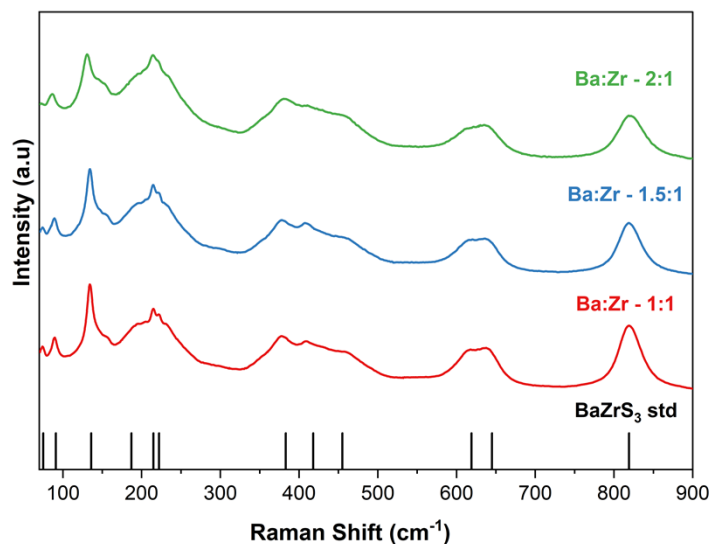

**Figure S2.** Raman spectra of Ba-Zr-S powder synthesized with different Ba:Zr ratios at 575 °C for 12 h with a sulfur pressure of 0.79 atm. The synthesized powder was washed with water to remove water-soluble impurities ( $\text{BaS}_3$ ). BaS and  $\text{ZrS}_2$  were used as barium and zirconium precursors, respectively.

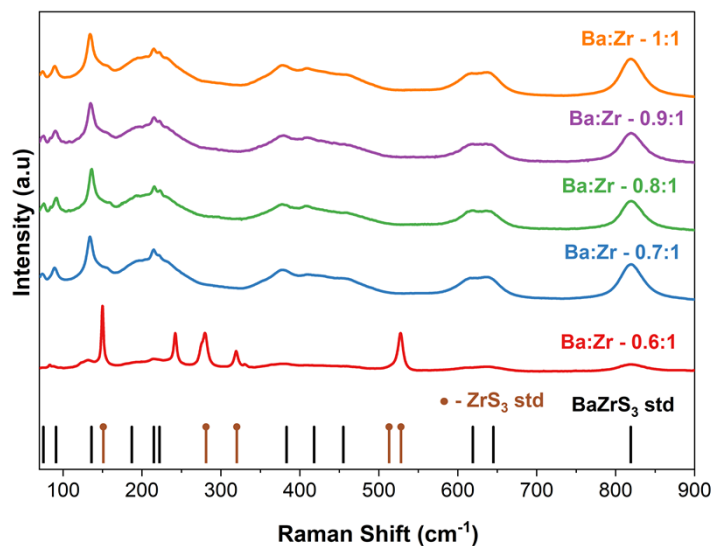

**Figure S3.** Raman spectra of Ba-Zr-S powder synthesized with different Ba:Zr ratios at 575 °C for 12 h with a sulfur pressure of 0.79 atm. BaS and ZrS<sub>2</sub> were used as barium and zirconium precursors, respectively.

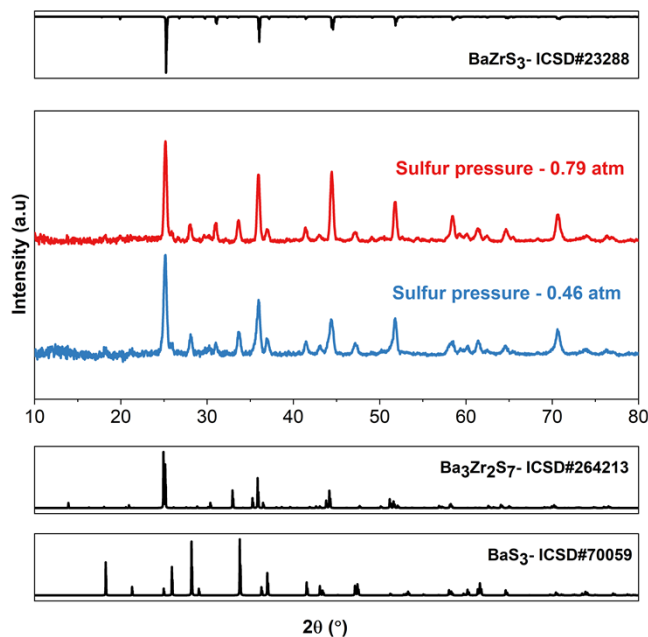

**Figure S4.** X-ray diffraction pattern of Ba-Zr-S powder synthesized with a Ba:Zr ratio of 1.5:1 and sulfur pressures of 0.79 atm and 0.46 atm, respectively, at 575 °C for 12 h. BaS and ZrS<sub>2</sub> were used as barium and zirconium precursors, respectively.

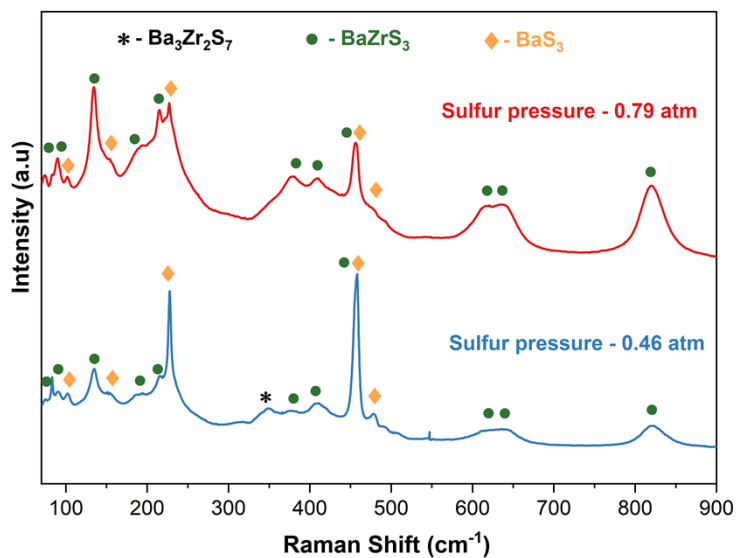

**Figure S5.** Raman spectra of Ba-Zr-S powder synthesized with a Ba:Zr ratio of 1.5:1 and sulfur pressures of 0.79 atm and 0.46 atm, respectively, at 575 °C for 12 h. BaS and ZrS<sub>2</sub> were used as barium and zirconium precursors, respectively.

# Stacked binary metal sulfides

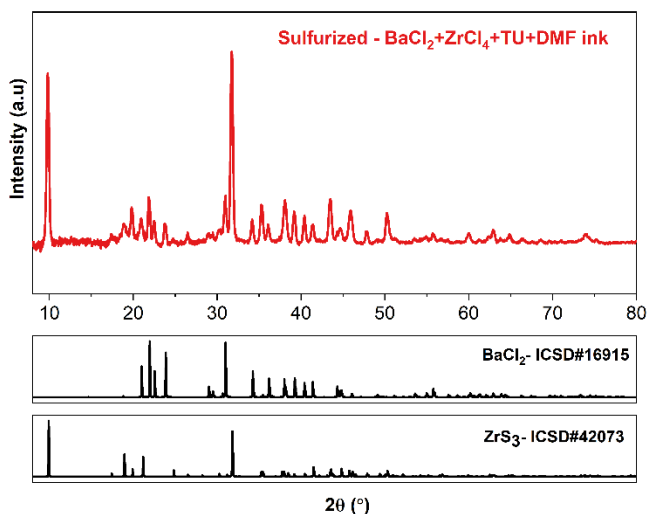

**Figure S6.** X-ray diffraction analysis confirmed the formation of BaCl<sub>2</sub> and ZrS<sub>3</sub> after sulfurizing the as-annealed film obtained from the mixed precursor ink of BaCl<sub>2</sub>-ZrCl<sub>4</sub>-thiourea (TU)-dimethyl formamide (DMF). The film underwent sulfurization at 575 °C for 12 h.

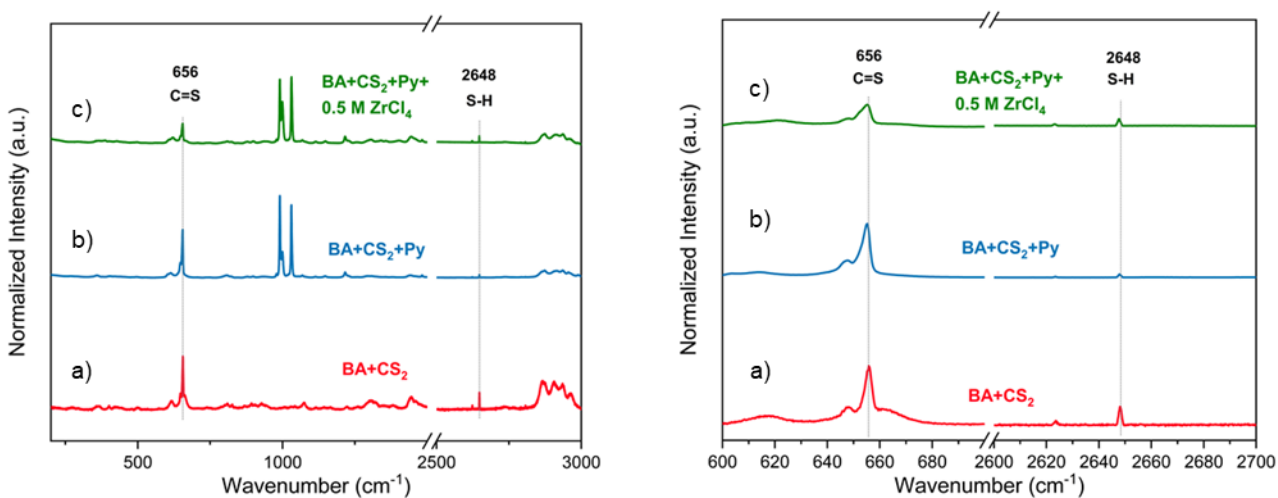

**Figure S7.** Liquid Raman on a) Butylamine (BA)+CS<sub>2</sub>, b) BA+CS<sub>2</sub>+Pyridine (Py), and c) BA+CS<sub>2</sub>+Py+ZrCl<sub>4</sub> (0.5 M). The emergence of a new peak at 2648 cm<sup>-1</sup> suggests the formation of the dithiocarbamate group. The broadening of the C=S peak at 656 cm<sup>-1</sup> in (c) indicate metal-sulfur interaction.

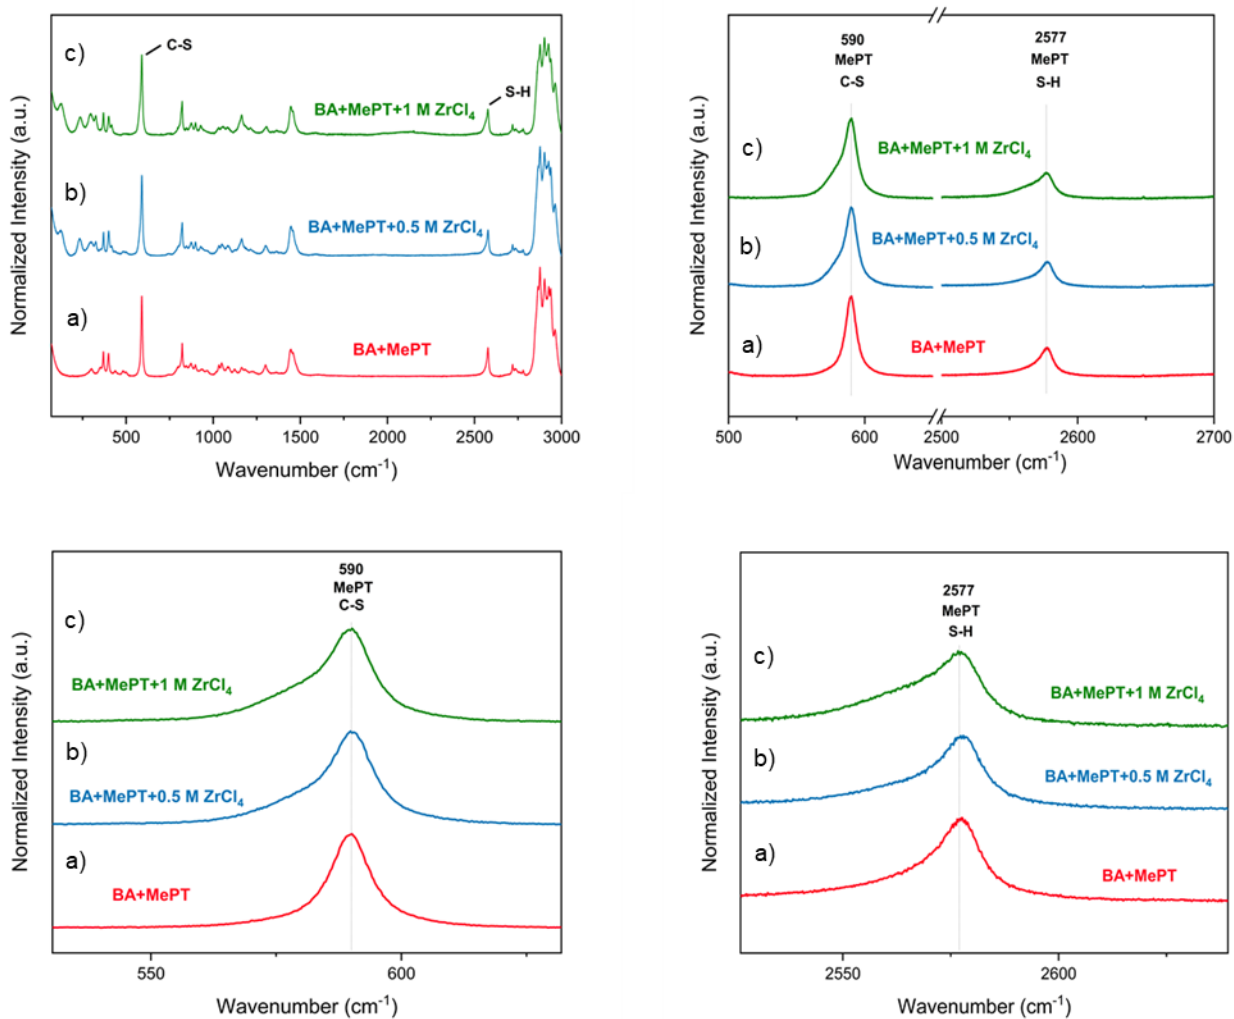

**Figure S8.** Liquid Raman on Butylamine a) (BA)+2-methyl-2-propanethiol (MePT), b) BA+MePT+ZrCl<sub>4</sub> (0.5 M), and c) BA+MePT+ZrCl<sub>4</sub> (1 M). The slight broadening and reduction in the ratio of area under peaks of SH to C-S from 0.62 to 0.49 suggests the interaction of metal, sulfur, and thiolate formation. However, insufficient SH peak intensity reduction means the complete substitution of chlorine with thiolate did not occur.

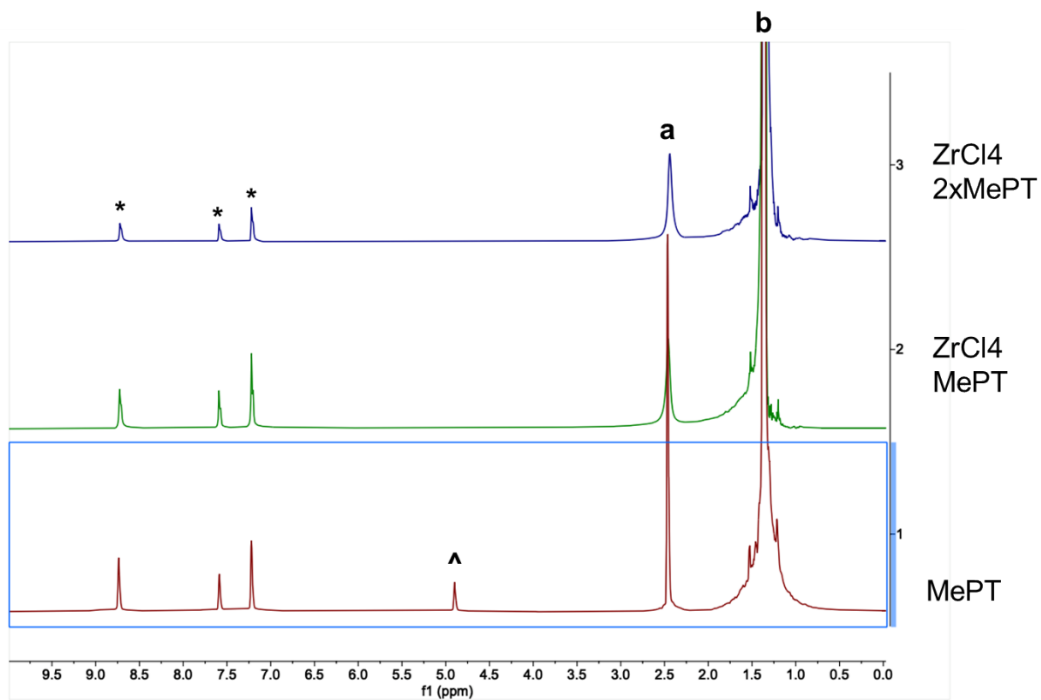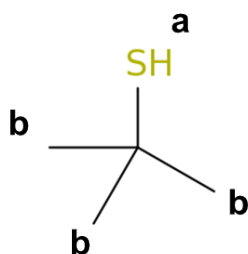

^ water

\* d-pyridine

**Figure S9.**  $^1\text{H-NMR}$  analysis on only 2-methyl-2-propanethiol (MePT), stoichiometric MePT+ $\text{ZrCl}_4$ , and twice stoichiometric MePT+ $\text{ZrCl}_4$  in d-pyridine. The slight broadening of the peak for H bound to sulfur suggests the interaction of metal and sulfur and thiolate formation. However, insufficient SH peak intensity reduction means that complete substitution of chlorine with thiolate did not occur.

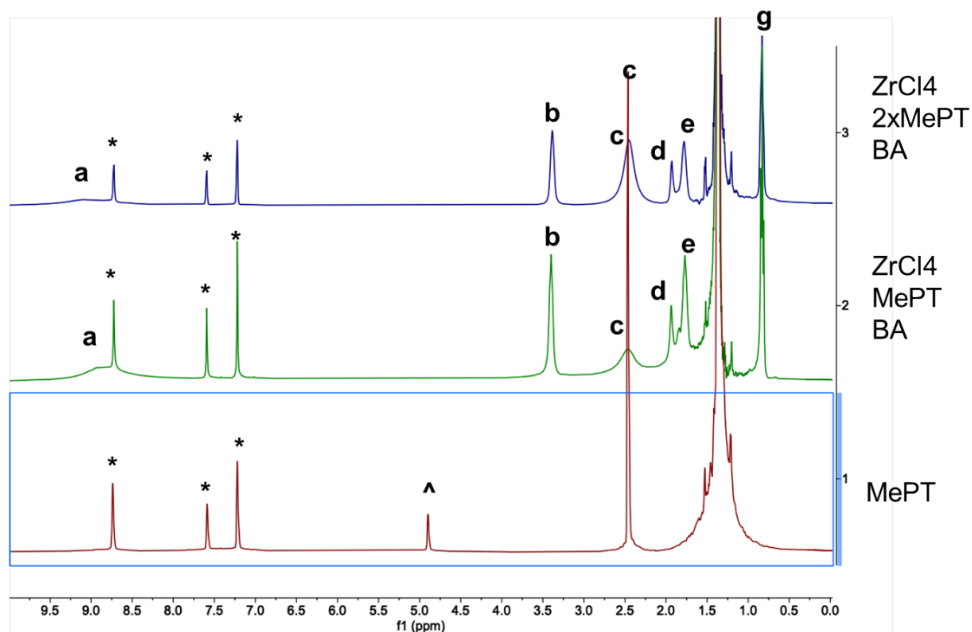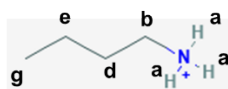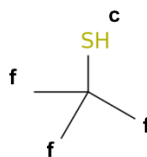

^ water

\* d-pyridine

**Figure S10.**  $^1\text{H-NMR}$  analysis on only 2-methyl-2-propanethiol (MePT), stoichiometric MePT+ stoichiometric butylamine (BA)+ $\text{ZrCl}_4$ , and twice stoichiometric MePT+stoichiometric BA+ $\text{ZrCl}_4$  in d-pyridine. The broadening of the peak for proton bound to sulfur and reduction in the ratio of the peak intensities of proton at a-site to proton at b-site suggests the increased interaction of thiol and Butylamine as such intensity reduction was not observed without Butylamine.



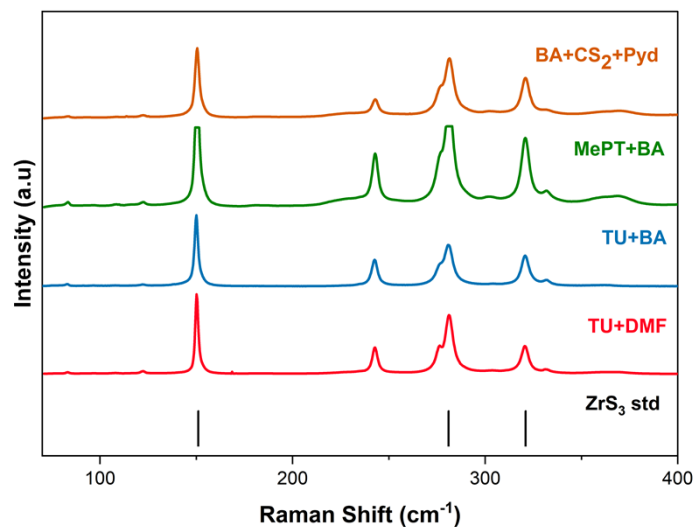

**Figure S11.** Raman of  $ZrS_3$  film synthesized from 4 different solution chemistries with  $ZrCl_4$  metal precursor. The films were sulfurized at  $575\text{ }^\circ\text{C}$  for 6 h. Reference Raman peaks were identified by Osada et al.<sup>2</sup>

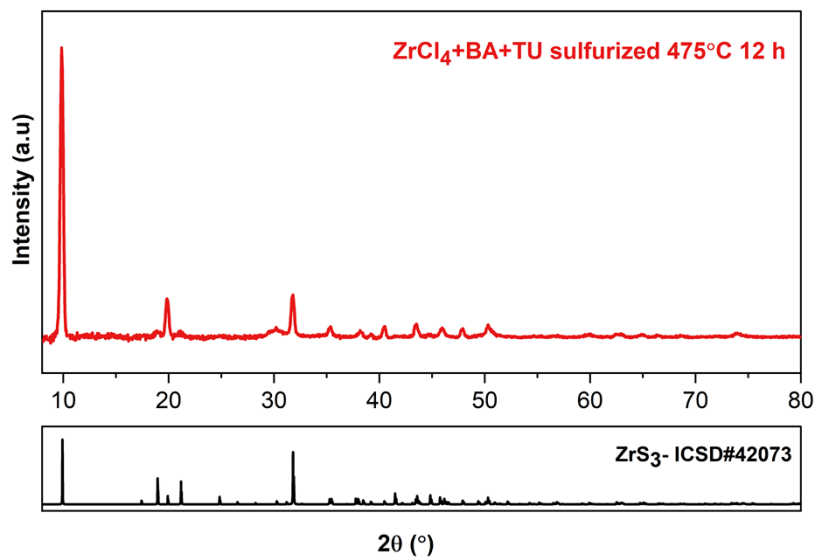

**Figure S12.** X-ray diffraction pattern of  $ZrS_3$  film synthesized from  $ZrCl_4$  precursors. The films were sulfurized at  $475\text{ }^\circ\text{C}$  for 12 h.

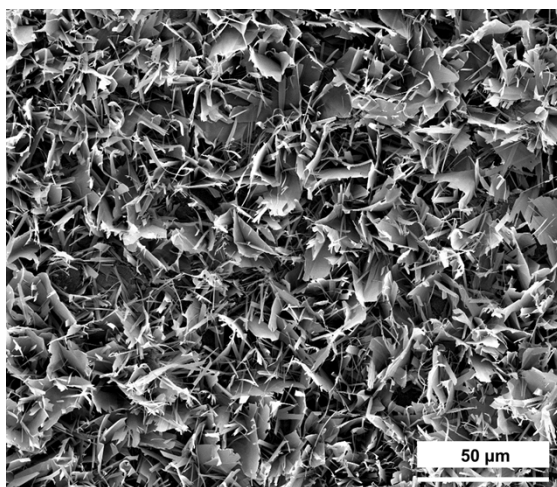

**Figure S13.** SEM top view of  $ZrS_3$  film synthesized from  $ZrCl_4$ -2-methyl-2-propanethiol-butylamine solution chemistry. The film was sulfurized at 575 °C for 6 h.

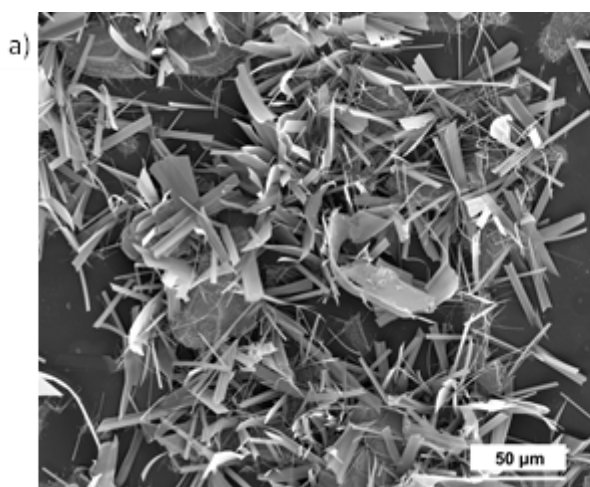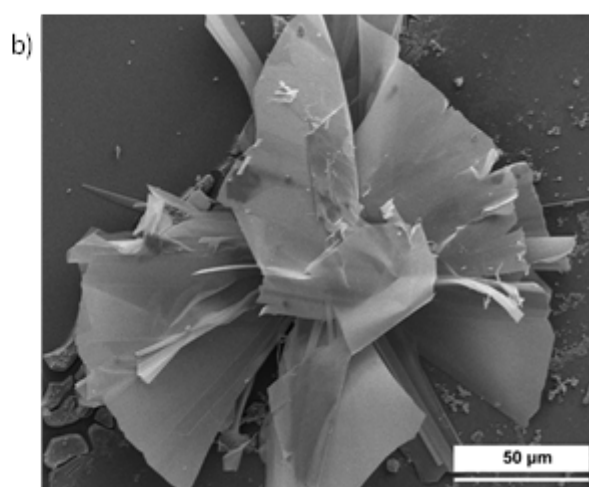

**Figure S14.** SEM top view of  $ZrS_3$  films synthesized from a)  $ZrCl_4$ -thiourea-dimethyl formamide solution chemistry and b)  $ZrCl_4$ -thiourea-butylamine solution chemistry. The films were sulfurized at 575 °C for 6 h.

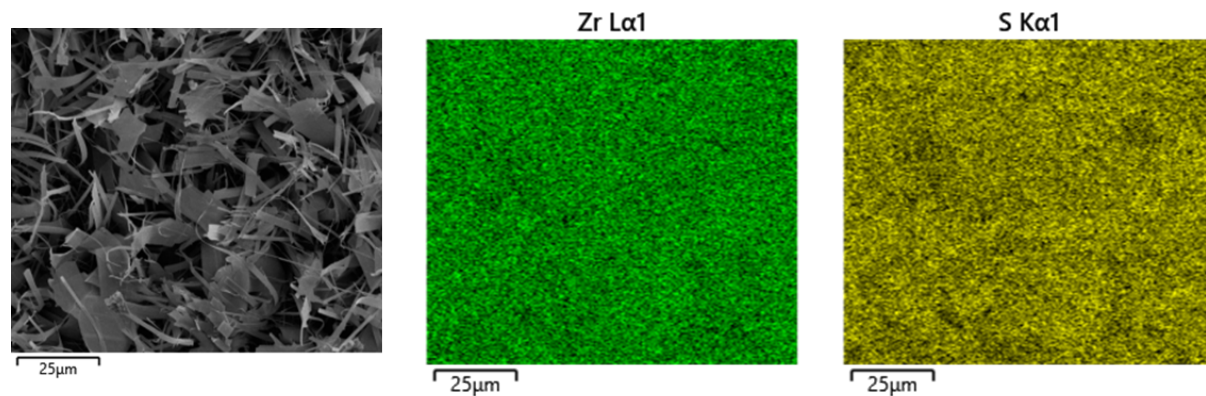

**Figure 15.** EDX mapping of  $ZrS_3$  film synthesized from  $ZrCl_4$ -butylamine- $CS_2$ -pyridine solution chemistry confirms only Zr and S in the  $ZrS_3$  grains. The film was sulfurized at 575 °C for 6 h.

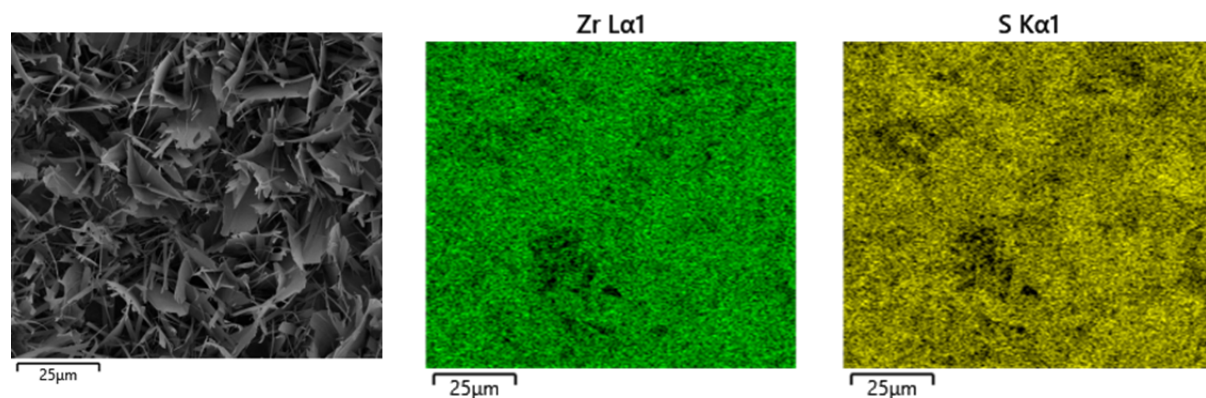

**Figure S16.** EDX mapping of  $ZrS_3$  film synthesized from  $ZrCl_4$ -2-methyl-2-propanethiol-butylamine solution chemistry confirms the presence of only Zr and S in the  $ZrS_3$  grains. The film was sulfurized at 575 °C for 6 h.

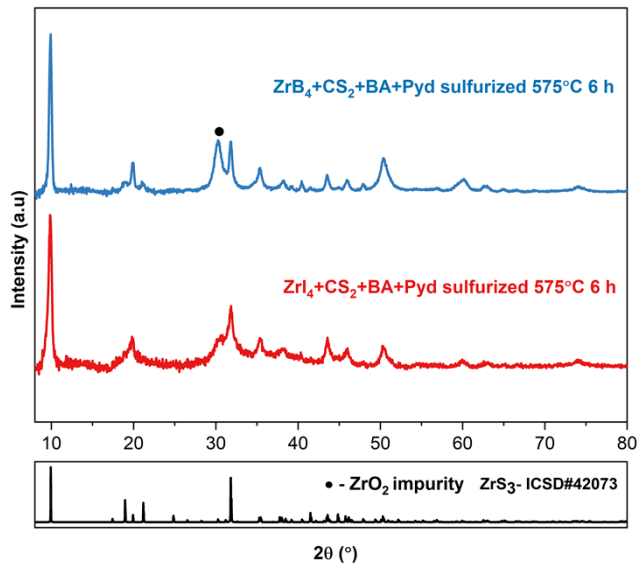

**Figure S17.** X-ray diffraction pattern of ZrS<sub>3</sub> film synthesized from ZrBr<sub>4</sub> and ZrI<sub>4</sub> metal precursors. The films were sulfurized at 575 °C for 6 h.

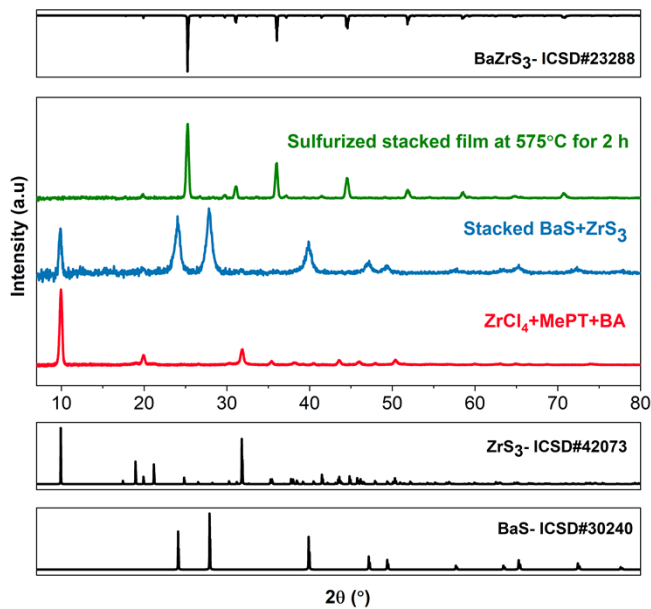

**Figure S18.** X-ray diffraction pattern of ZrS<sub>3</sub>, as-coated bilayer stack of ZrS<sub>3</sub> and BaS, and BaZrS<sub>3</sub> after sulfurization where ZrS<sub>3</sub> is synthesized from ZrCl<sub>4</sub>-2-methyl-2-propanethiol-butylamine solution chemistry. The stacked film was sulfurized at 575 °C for 2 h.

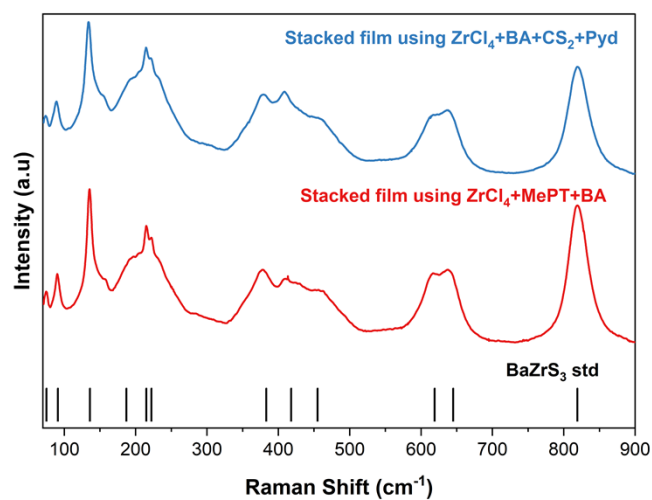

**Figure S19.** Raman spectra of BaZrS<sub>3</sub> films synthesized from the BaS-ZrS<sub>3</sub> stacked film. ZrS<sub>3</sub> layer was achieved through the sulfurization of as-annealed film ZrCl<sub>4</sub> solution chemistries. The films were sulfurized at 575 °C for 6 h. Reference Raman peaks were identified by Pandey et al.<sup>1</sup>

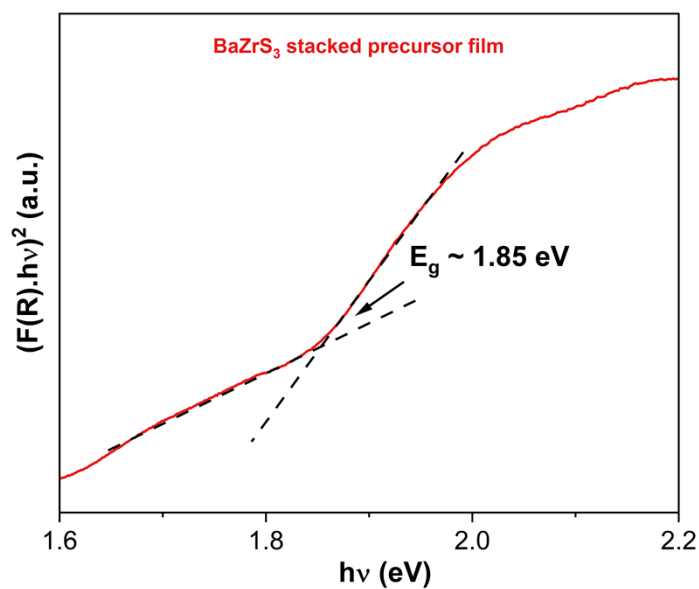

**Figure S20.** Kubelka-Munk transformation applied to the diffuse reflectance spectra of the BaZrS<sub>3</sub> film derived from stacked BaS-ZrS<sub>3</sub> precursor film. The stacked film was sulfurized at 575 °C for 2 h.

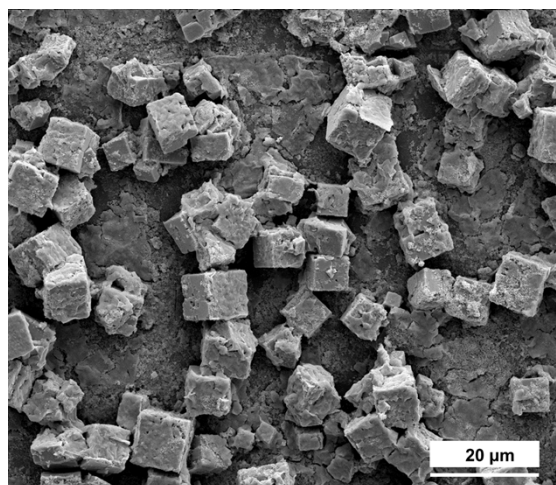

**Figure S21.** SEM top view of  $\text{BaZrS}_3$  after sulfurization of  $\text{ZrS}_3$ - $\text{BaS}$  stack where  $\text{ZrS}_3$  is synthesized from  $\text{ZrCl}_4$ -2-methyl-2-propanethiol-butylamine. The film was sulfurized at  $575^\circ\text{C}$  for 2 h.

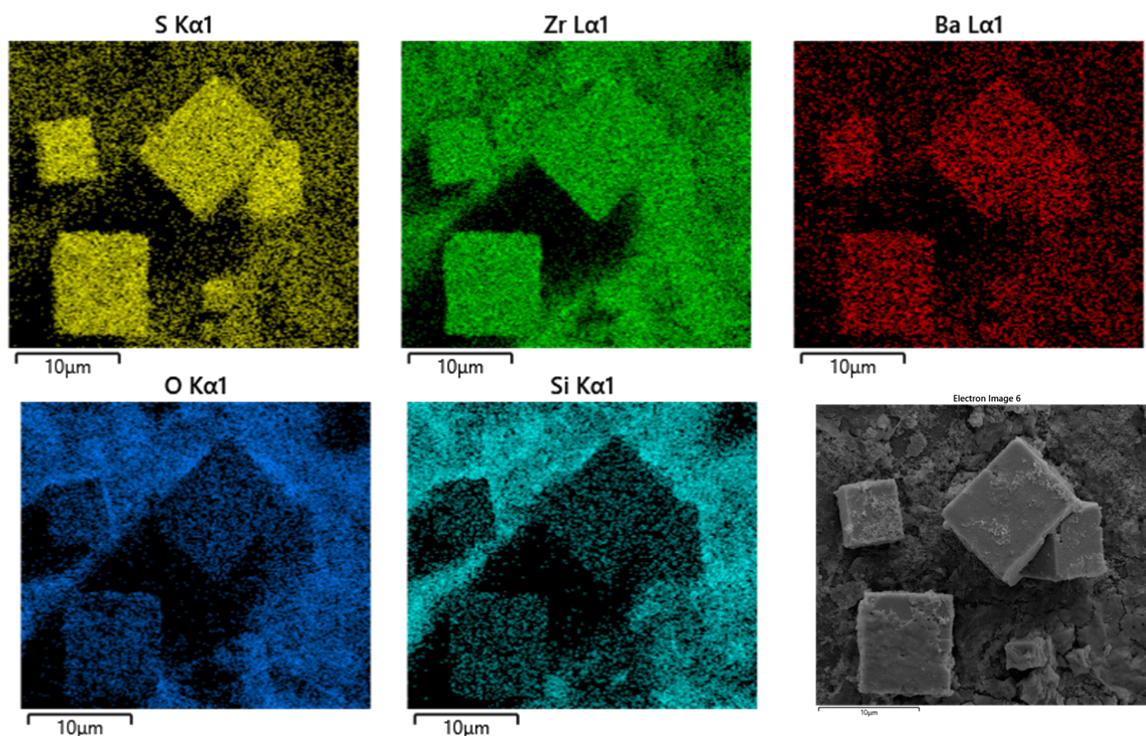

**Figure S22.** EDX map of  $\text{BaZrS}_3$  after sulfurization of  $\text{ZrS}_3$ - $\text{BaS}$  stack where  $\text{ZrS}_3$  is synthesized from  $\text{ZrCl}_4$ -2-methyl-2-propanethiol-butylamine. The film was sulfurized at  $575^\circ\text{C}$  for 2 h.

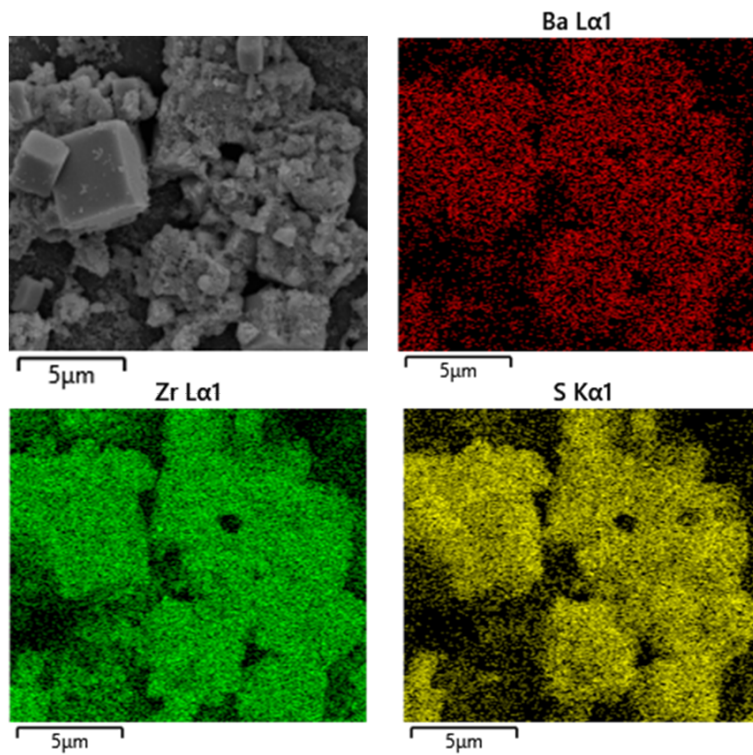

**Figure S23.** EDX map of BaZrS<sub>3</sub> after sulfurization of ZrS<sub>3</sub>-BaS stack where ZrS<sub>3</sub> is synthesized from ZrCl<sub>4</sub>-CS<sub>2</sub>- butylamine-pyridine. The film was sulfurized at 575 °C for 2 h.

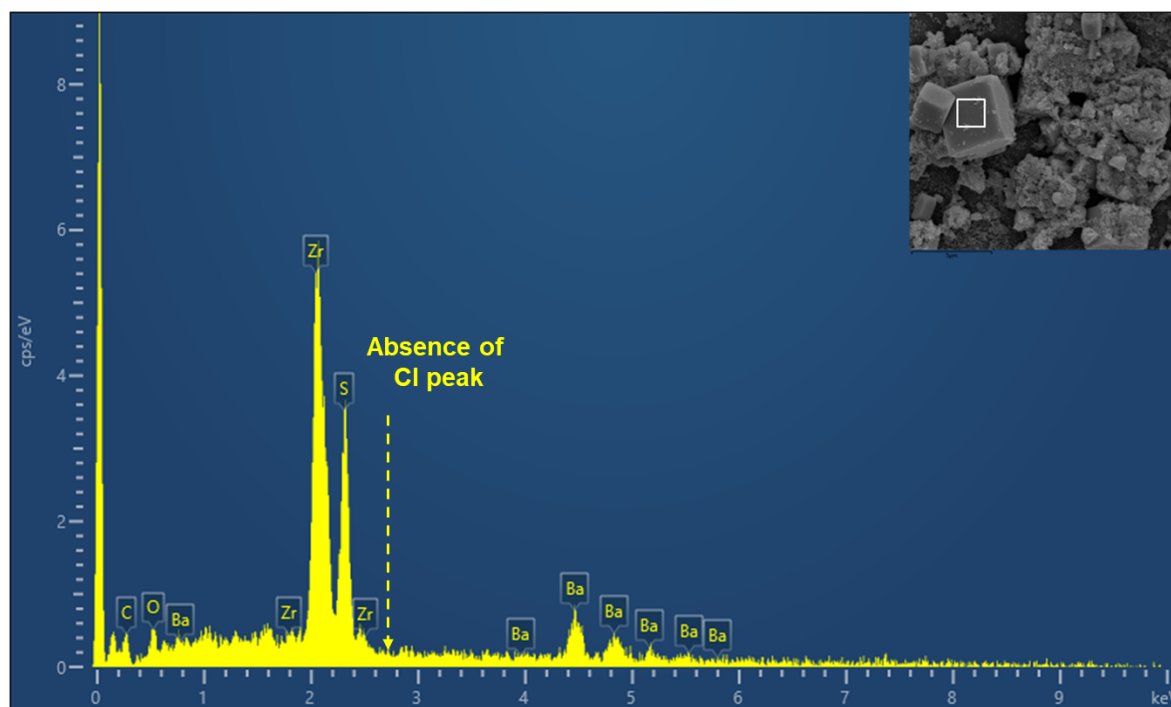

**Figure S24.** SEM-EDX analysis of  $\text{BaZrS}_3$  after sulfurization of  $\text{ZrS}_3$ - $\text{BaS}$  stack where  $\text{ZrS}_3$  is synthesized from  $\text{ZrCl}_4$ - $\text{CS}_2$ -butylamine-pyridine. The film was sulfurized at  $575^\circ\text{C}$  for 2 h. The film does not contain any chlorine.

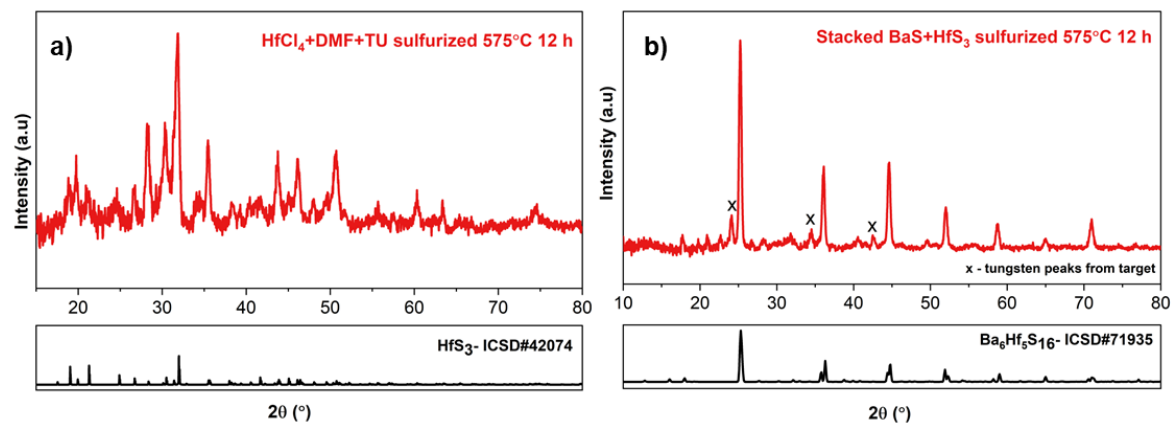

**Figure S25.** X-ray diffraction plot showing a) the synthesis of  $\text{HfS}_3$  from  $\text{HfCl}_4$ -dimethyl formamide (DMF)-thiourea (TU) chemistry at  $575^\circ\text{C}$  for 6 h and b) the synthesis of a Ruddlesden Popper phase of  $\text{Ba-Hf-S}$  synthesized from a bilayer stack of  $\text{HfS}_3$ - $\text{BaS}$  where  $\text{HfS}_3$  was synthesized from  $\text{HfCl}_4$ -dimethyl formamide-thiourea chemistry. The stacked film was sulfurized at  $575^\circ\text{C}$  for 2 h.



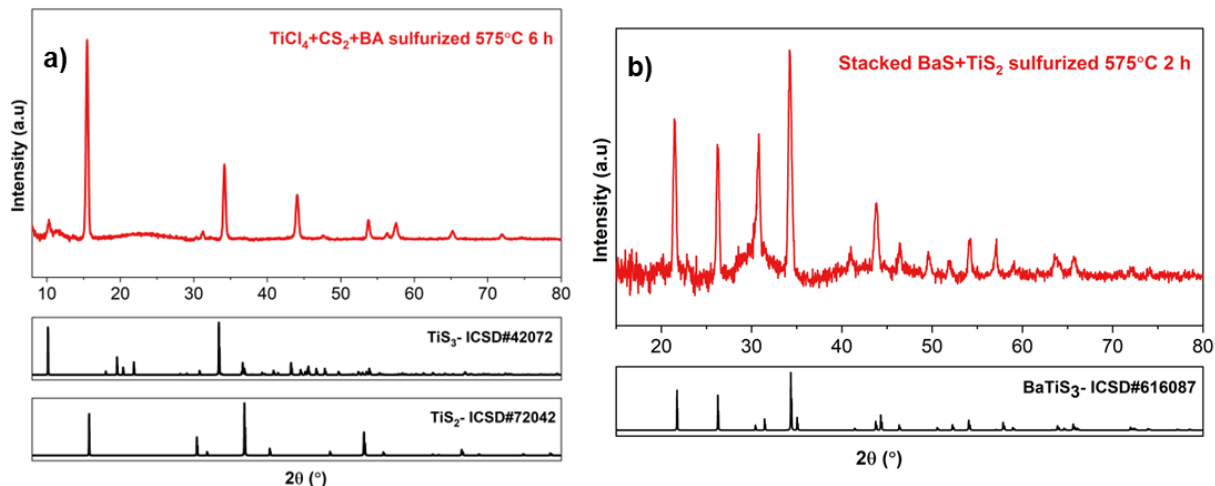

**Figure S26.** X-ray diffraction plot showing a) the synthesis of a mixture of  $\text{TiS}_3$  and  $\text{TiS}_2$  from  $\text{TiCl}_4$ - $\text{CS}_2$ -butylamine (BA)-pyridine (Pyd) chemistry at  $575^\circ\text{C}$  for 6 h and b) the synthesis of  $\text{BaTiS}_3$  from a bilayer stack of  $\text{TiS}_2/\text{TiS}_3$ -BaS. The stacked film was sulfurized at  $575^\circ\text{C}$  for 2 h.

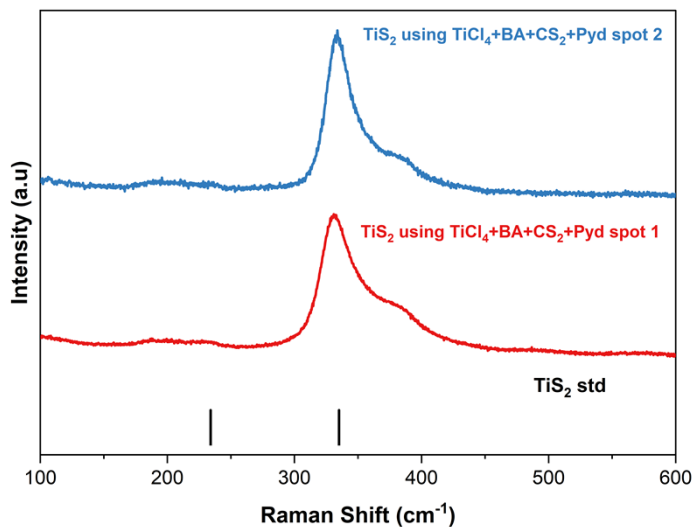

**Figure S27.** Raman of  $\text{TiS}_2$  film synthesized from  $\text{TiCl}_4$ -butylamine (BA)- $\text{CS}_2$ -pyridine (Pyd) and sulfurized at  $575^\circ\text{C}$  for 6 h.

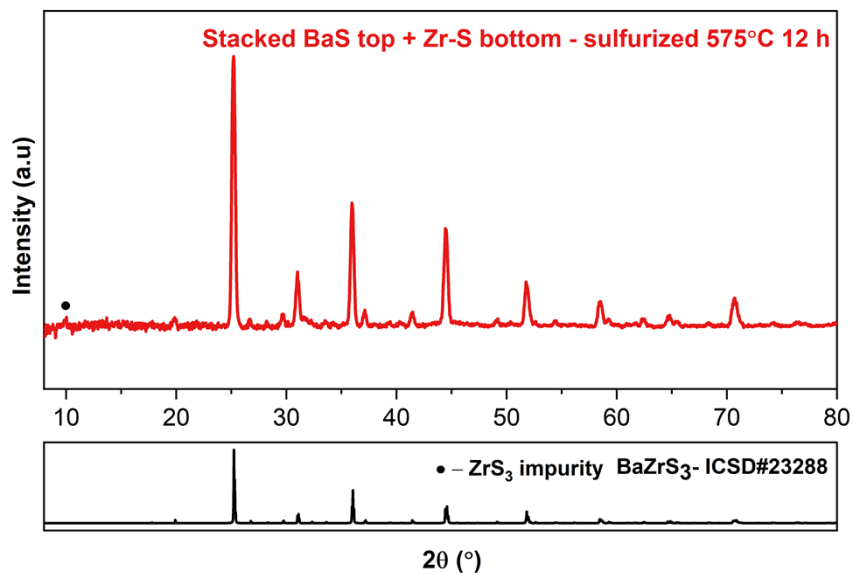

**Figure S28.** X-ray diffraction pattern of  $\text{BaZrS}_3$  after sulfurization of as annealed  $\text{ZrS}_x$  and BaS stack where  $\text{ZrS}_x$  is synthesized from  $\text{ZrCl}_4$ -butylamine- $\text{CS}_2$ -pyridine. The film was sulfurized at 575 °C for 12 h.

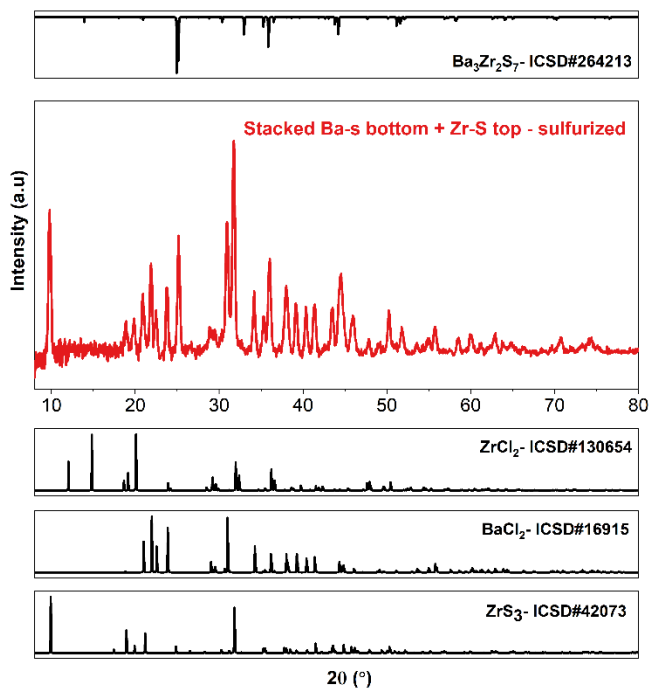

**Figure S29.** X-ray diffraction pattern confirmed chlorine impurity after the sulfurization of a stack of BaS at the bottom and as annealed  $\text{ZrS}_x$  at the top where  $\text{ZrS}_x$  is synthesized from  $\text{ZrCl}_4$ -butylamine- $\text{CS}_2$ -pyridine. The film was sulfurized at 575 °C for 12 h and showed a secondary  $\text{BaCl}_2$  phase.

# Hybrid colloidal precursor

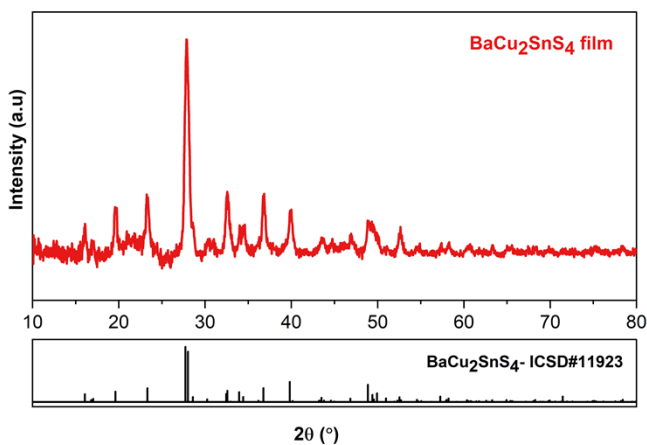

**Figure S30.** X-ray diffraction pattern of Cu<sub>2</sub>BaSnS<sub>4</sub> synthesized from fully dissolved metal sulfides/pure metal precursor ink. Cu<sub>2</sub>S, BaS, and Sn powder were dissolved in a mixture of propylamine-CS<sub>2</sub>-pyridine to form a 0.4 M total metal concentration ink. The ink was dropcasted at 350 °C and annealed for 10 min.

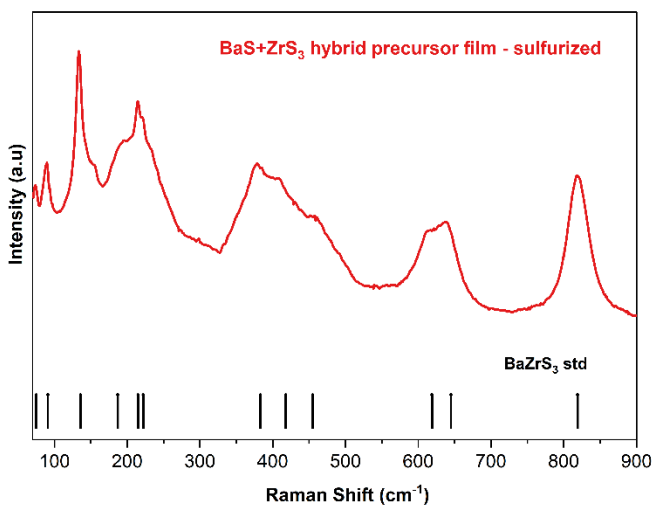

**Figure S31.** Raman spectra confirmed the synthesis of BaZrS<sub>3</sub> from a hybrid precursor ink of dissolved BaS and suspended ZrS<sub>3</sub>. The film was sulfurized at 575 °C for 2 h. ZrS<sub>3</sub> was synthesized from sulfurization of Zr nanopowder, resulting in less than 1-micron size grains of ZrS<sub>3</sub>. Reference Raman peaks were identified by Pandey et al.<sup>1</sup>

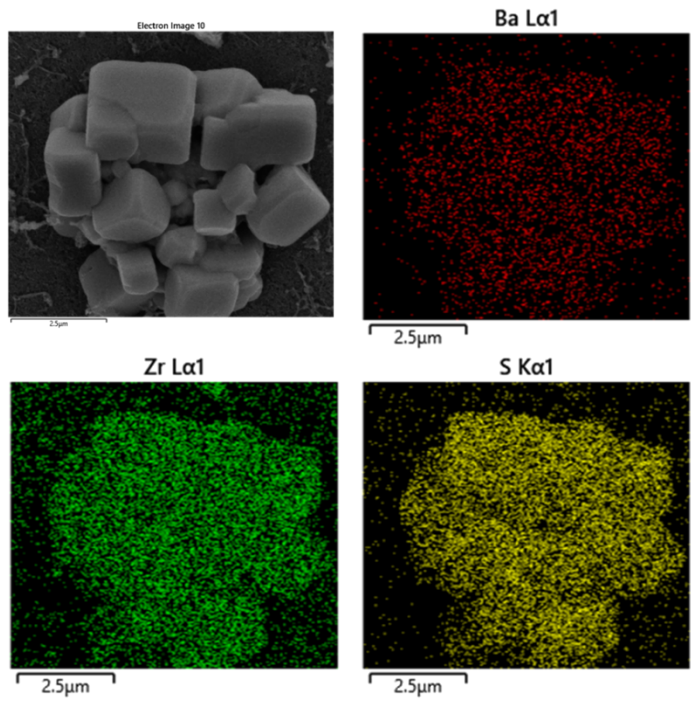

**Figure S32.** EDX map of BaZrS<sub>3</sub> after sulfurization of as-coated film from ZrS<sub>3</sub>-BaS hybrid precursor ink. The film was sulfurized at 575 °C for 2 h. ZrS<sub>3</sub> was synthesized from the sulfurization of Zr nanopowder, resulting in less than 1-micron grains of ZrS<sub>3</sub>.

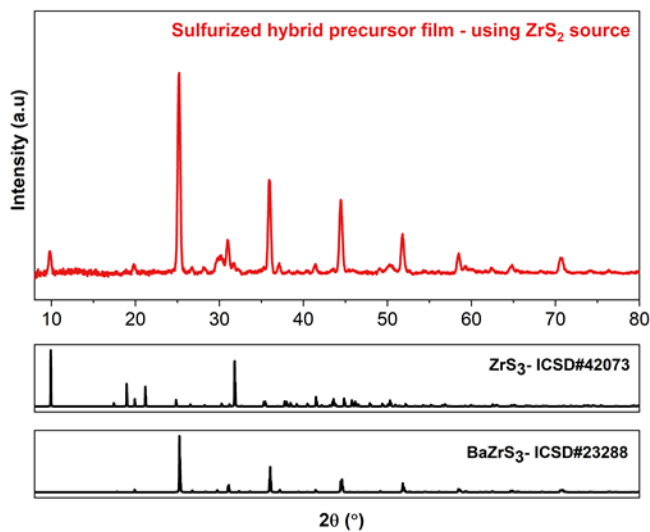

**Figure S33.** XRD pattern of BaZrS<sub>3</sub> after sulfurization of a doctor blade coated ZrS<sub>3</sub>-BaS hybrid precursor ink, where ZrS<sub>3</sub> was synthesized from sulfurization of bulk ZrS<sub>2</sub> powder, resulting in large grains of ZrS<sub>3</sub>. The film was sulfurized at 575 °C for 2 h and contains unreacted ZrS<sub>3</sub> and BaS<sub>3</sub> along with BaZrS<sub>3</sub>.

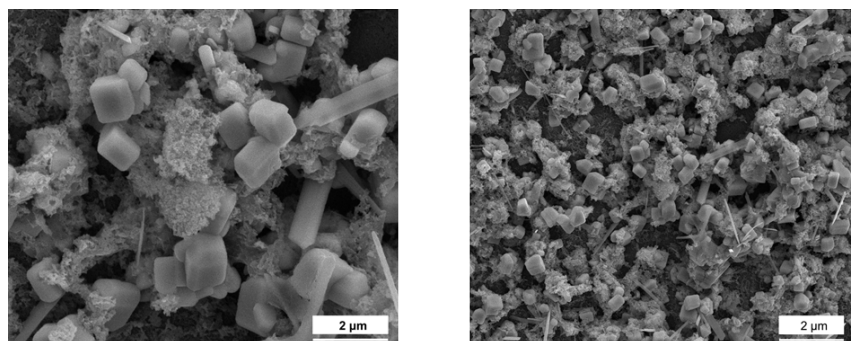

**Figure S34.** SEM top view of  $\text{BaZrS}_3$  after sulfurization of a doctor blade coated  $\text{ZrS}_3$ - $\text{BaS}$  hybrid precursor ink, where  $\text{ZrS}_3$  was synthesized from sulfurization of bulk  $\text{ZrS}_2$  powder resulting in large grains of  $\text{ZrS}_3$ . The film was sulfurized at  $575\text{ }^\circ\text{C}$  for 2 h and contains unreacted  $\text{ZrS}_3$  and  $\text{BaS}_3$  along with  $\text{BaZrS}_3$ .

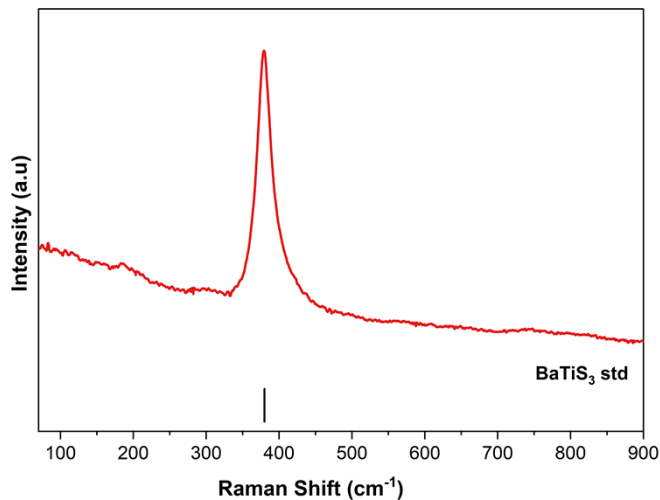

**Figure S35.** Raman spectra confirmed the synthesis of  $\text{BaTiS}_3$  from a hybrid precursor ink of dissolved  $\text{BaS}$  and suspended  $\text{TiS}_2$ . The film was sulfurized at  $575\text{ }^\circ\text{C}$  for 2 h.  $\text{TiS}_2$  was synthesized from the sulfurization of  $\text{TiH}_2$  nanopowder.

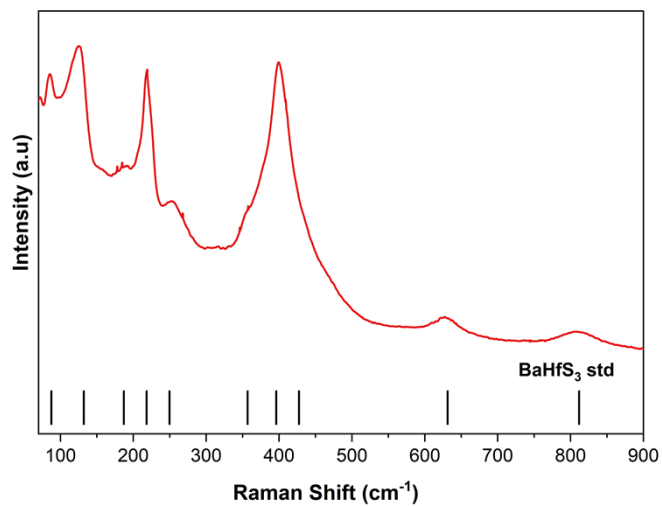

**Figure S36.** Raman spectra confirmed the synthesis of BaHfS<sub>3</sub> from a hybrid precursor ink of dissolved BaS and suspended HfS<sub>3</sub>. The film was sulfurized at 575 °C for 2 h. HfS<sub>3</sub> was synthesized from the sulfurization of HfH<sub>2</sub> nanopowder.

# Selenium liquid flux

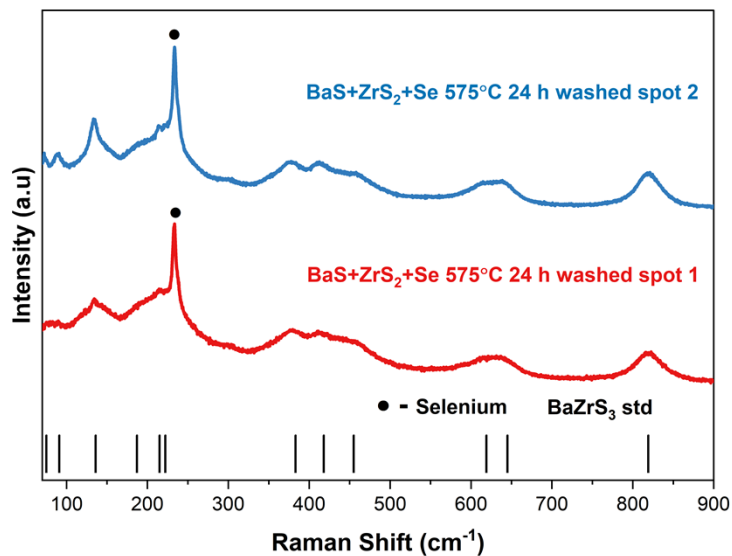

**Figure S37.** Raman of water-washed  $\text{BaZrS}_3$  synthesized from Se flux at  $575\text{ }^\circ\text{C}$  for 24 h. Raman shows that slight impurities of selenium remained in the powder. However, the excess selenium can readily dissolve in an amine-thiol mixture or other solution chemistries. Reference Raman peaks were identified by Pandey et al.<sup>1</sup>

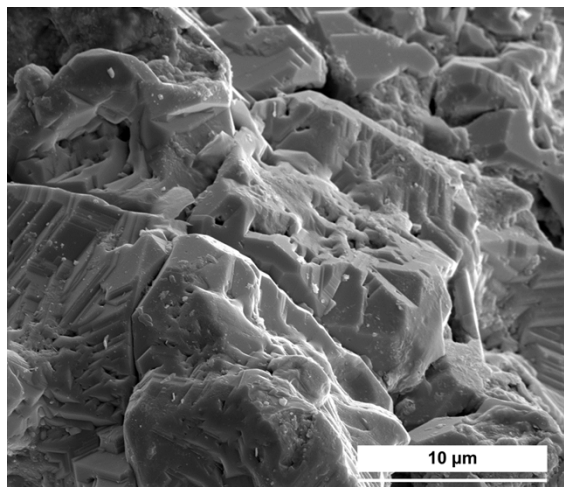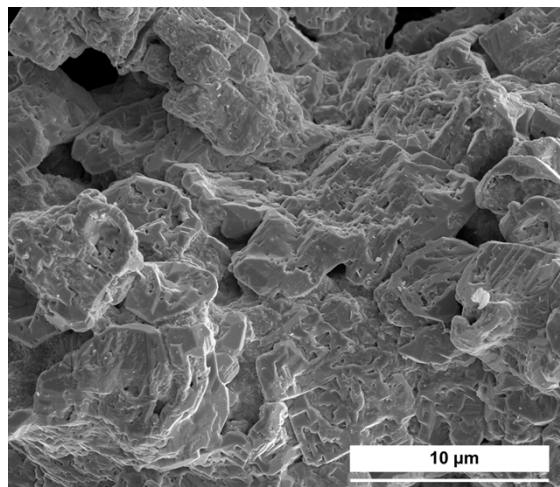

**Figure S38.** SEM images of water-washed  $\text{BaZrS}_3$  synthesized from selenium liquid flux at  $575\text{ }^\circ\text{C}$  for 24 h.

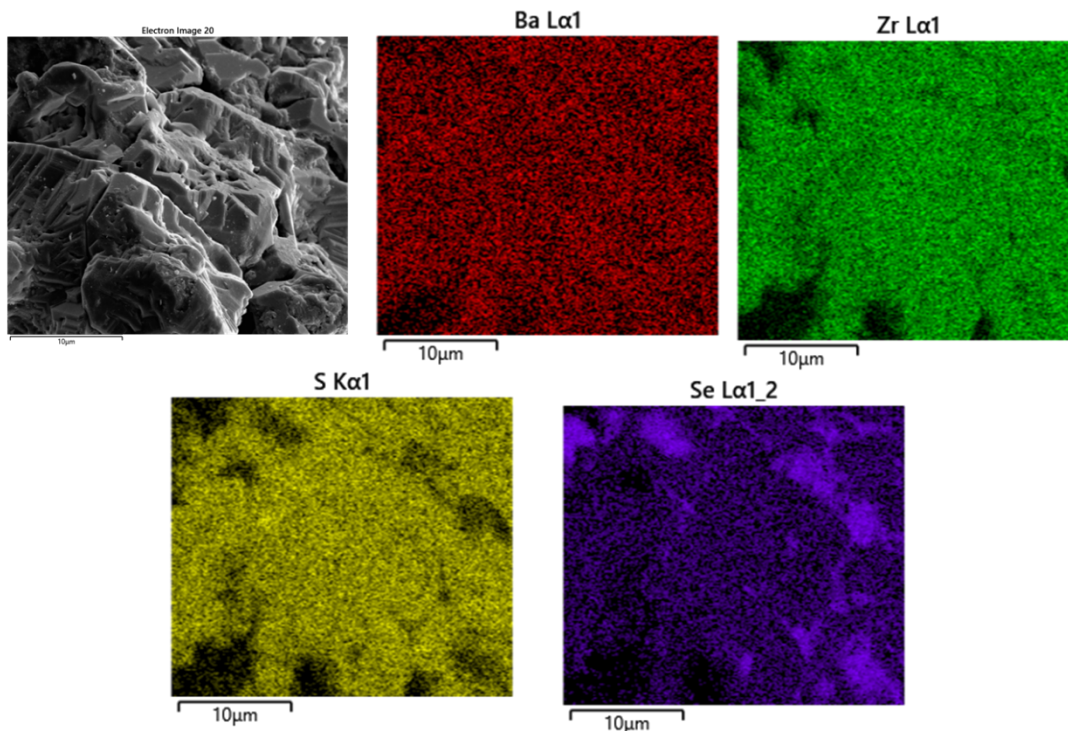

**Figure S39.** SEM-EDX analysis of water-washed  $\text{BaZrS}_3$  synthesized from selenium liquid flux at  $575^\circ\text{C}$  for 24 h. The  $\text{BaZrS}_3$  grains predominantly contain Ba, Zr, and S, with negligible selenium within the grain. However, some pockets of residual bulk selenium remained, which can be removed with a relevant solution treatment.

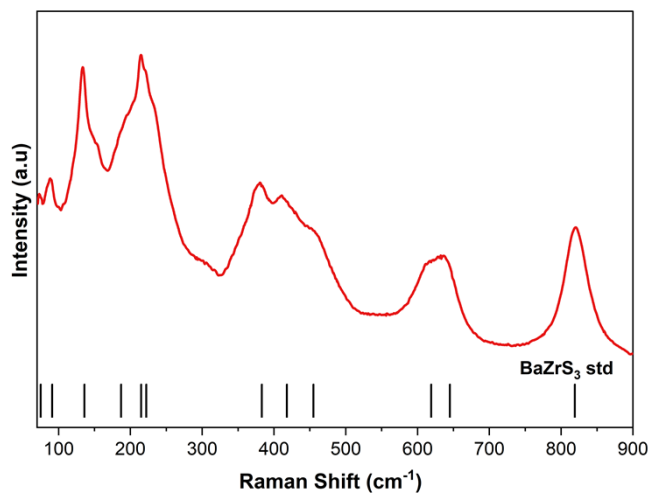

**Figure S40.** Raman of amine-thiol washed  $\text{BaZrS}_3$  synthesized from Se flux at  $575^\circ\text{C}$  for 24 h. After the water wash, the  $\text{BaZrS}_3$  powder was rinsed in a propylamine-ethanedithiol mixture (5:1 vol:vol). The residual selenium was washed away. Reference Raman peaks were identified by Pandey et al.<sup>1</sup>



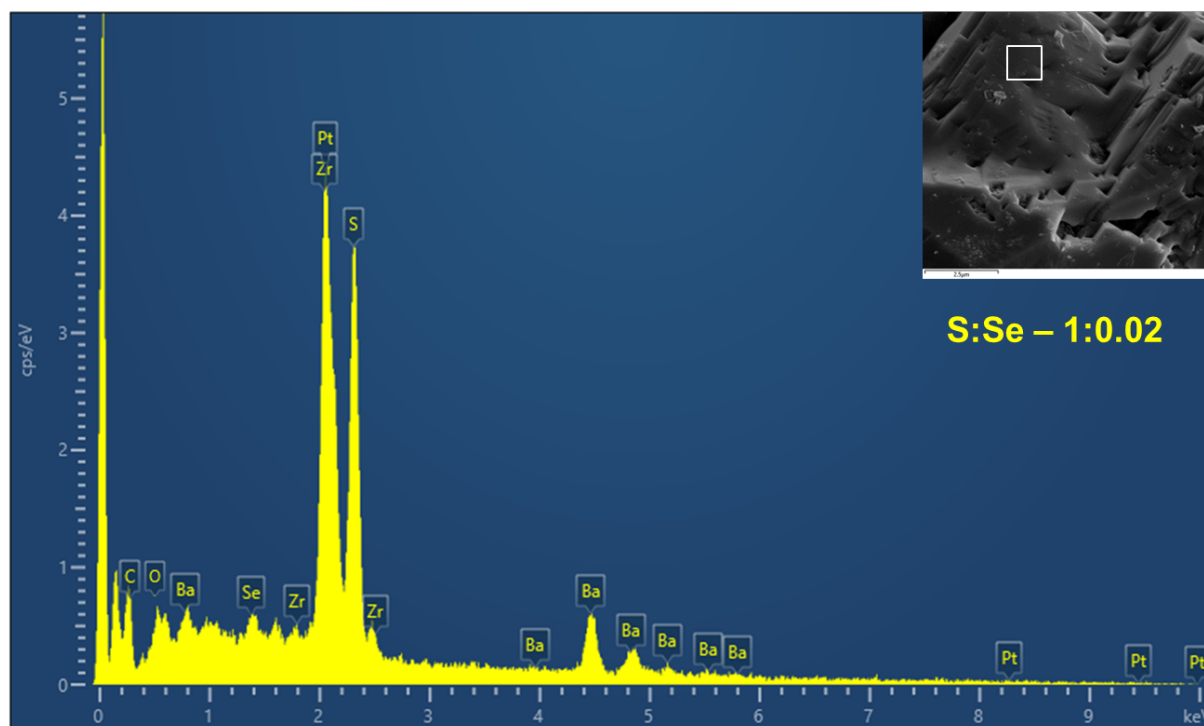

**Figure S41.** SEM-EDX analysis of water-washed  $\text{BaZrS}_3$  synthesized from selenium liquid flux at  $575^\circ\text{C}$  for 24 h. The  $\text{BaZrS}_3$  grains predominantly contain Ba, Zr, and S, with negligible selenium within the grain. After the water wash, the  $\text{BaZrS}_3$  powder was rinsed in a propylamine-ethanedithiol mixture (5:1 vol:vol). The residual selenium was washed away. However, the EDX analysis shows that the grains are Ba-poor. It might be because some Ba was lost as  $\text{BaSe}_3$ .

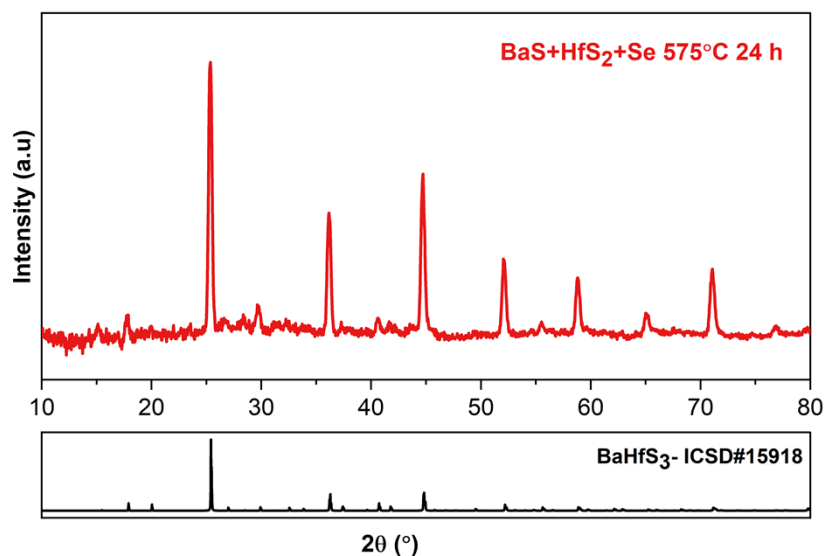

**Figure S42.** X-ray diffraction plot of water-washed  $\text{BaHfS}_3$  synthesized from selenium liquid flux at  $575^\circ\text{C}$  for 2 h.

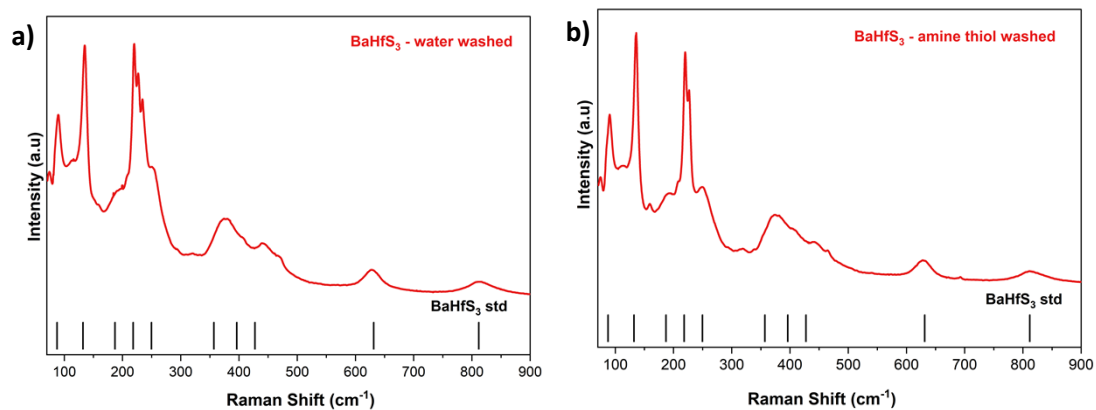

**Figure S43.** Raman spectra of a) water-washed  $\text{BaHfS}_3$  and b) propylamine-ethanedithiol-washed  $\text{BaHfS}_3$  synthesized from selenium liquid flux at  $575^\circ\text{C}$  for 24 h.

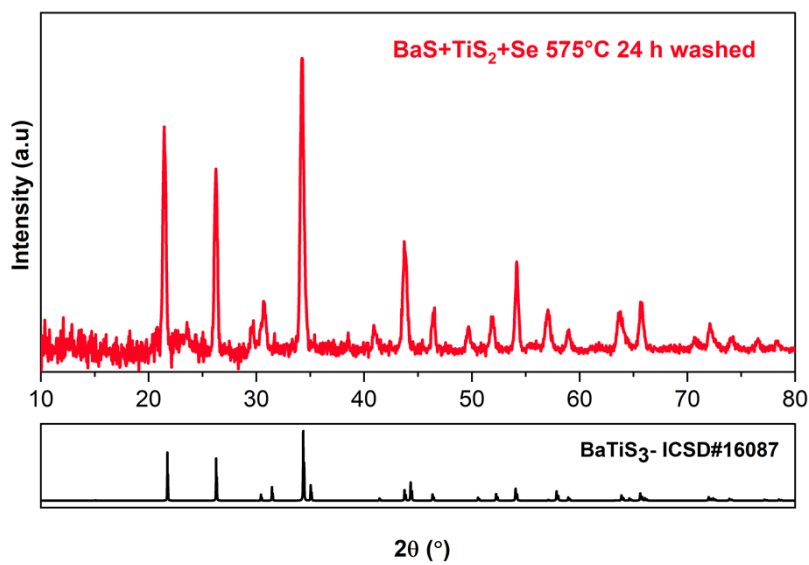

**Figure S44.** X-ray diffraction plot of water-washed  $\text{BaTiS}_3$  synthesized from selenium liquid flux at  $575^\circ\text{C}$  for 24 h.

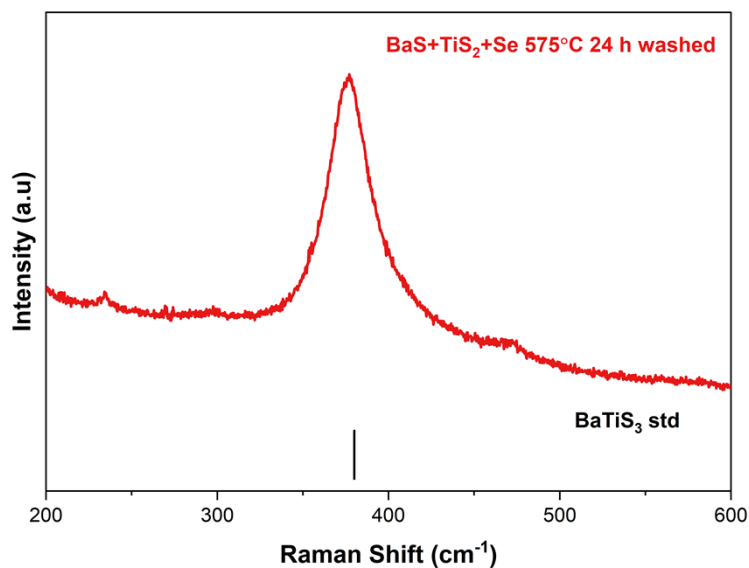

**Figure S45.** Raman spectra of water-washed BaTiS<sub>3</sub> synthesized from selenium liquid flux at 575 °C for 24 h.

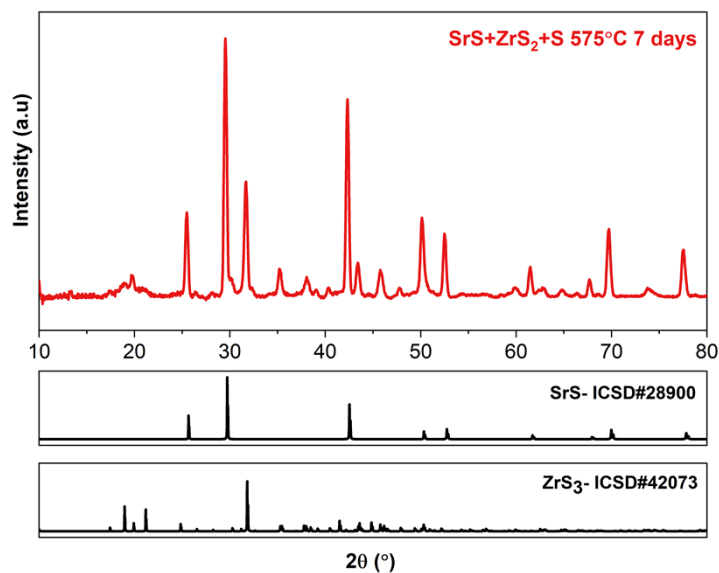

**Figure S46.** X-ray diffraction plot showing that the heating of the binary sulfides for the potential synthesis of SrZrS<sub>3</sub> in the presence of sulfur did not result in a ternary phase even after 7 days

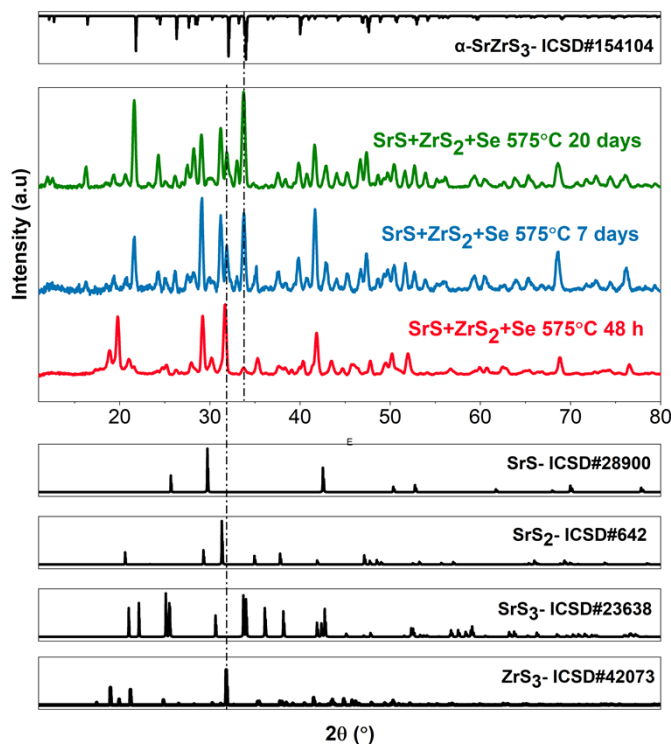

**Figure S47.** X-ray diffraction plot of the time evolution of  $\alpha$ -SrZrS<sub>3</sub> phase synthesized using binary sulfides and selenium liquid flux at 575 °C.

### References:

- (1) Pandey, J.; Ghoshal, D.; Dey, D.; Gupta, T.; Taraphder, A.; Koratkar, N.; Soni, A. Local Ferroelectric Polarization in Antiferroelectric Chalcogenide Perovskite BaZrS<sub>3</sub> Thin Films. *Phys Rev B* **2020**, *102* (20), 205308. <https://doi.org/10.1103/PhysRevB.102.205308>.
- (2) Osada, K.; Bae, S.; Tanaka, M.; Raebiger, H.; Shudo, K.; Suzuki, T. Phonon Properties of Few-Layer Crystals of Quasi-One-Dimensional ZrS<sub>3</sub> and ZrSe<sub>3</sub>. *The Journal of Physical Chemistry C* **2016**, *120* (8), 4653–4659. <https://doi.org/10.1021/acs.jpcc.5b12441>.
